# Supplementary material for: Bimodal Fluorescence/Magnetic Resonance Molecular Probes with Extended Spin Lifetimes
Source: PubMed Central journal article supplement — Chemistry. 2022 Jan 5;28(8):e202104158. doi: 10.1002/chem.202104158 (PMC9302690; doi:10.1002/chem.202104158), 2022-01-05
Supplement: CHEM-28-0-s001.pdf [file CHEM-28-0-s001.pdf]

# Chemistry–A European Journal

Supporting Information

## **Bimodal Fluorescence/Magnetic Resonance Molecular Probes with Extended Spin Lifetimes**

Shengjun Yang, Philip Saul, Salvatore Mamone, Lukas Kaltschnee, and Stefan Glögger\*

## Materials and instruments

All the chemicals used in the reaction were purchased from commercial suppliers without further treatment. Thin-layer chromatography (TLC) analysis was carried out on pre-coated silica plates. Column chromatography was performed using silica gel by using the eluents in the indicated v/v ratio.  $^1\text{H}$  NMR and  $^{13}\text{C}$  NMR spectra were recorded on a Bruker ultrashield 300 MHz spectrometer at 25 °C. Chemical shifts ( $\delta$ ) are given in parts per million (ppm) and referenced with respect to the residual  $^1\text{H}/^{13}\text{C}$  resonances of the deuterated solvent. High-resolution mass spectrometry (HR MS-ESI) spectra were taken on Thermo Scientific LTQ Orbitrap XL. Fluorescence spectra were recorded on an Agilent Cary Eclipse fluorescence spectrophotometer (with temperature controller) at 25 °C.  $^{15}\text{N}$ ,  $^{15}\text{N}$ -Azobenzene- $\text{d}_{10}$  has been synthesized according to literature proceedings<sup>[1]</sup> with the exception that Anilin- $\text{d}_5$  has been used instead of the protonated starting material.

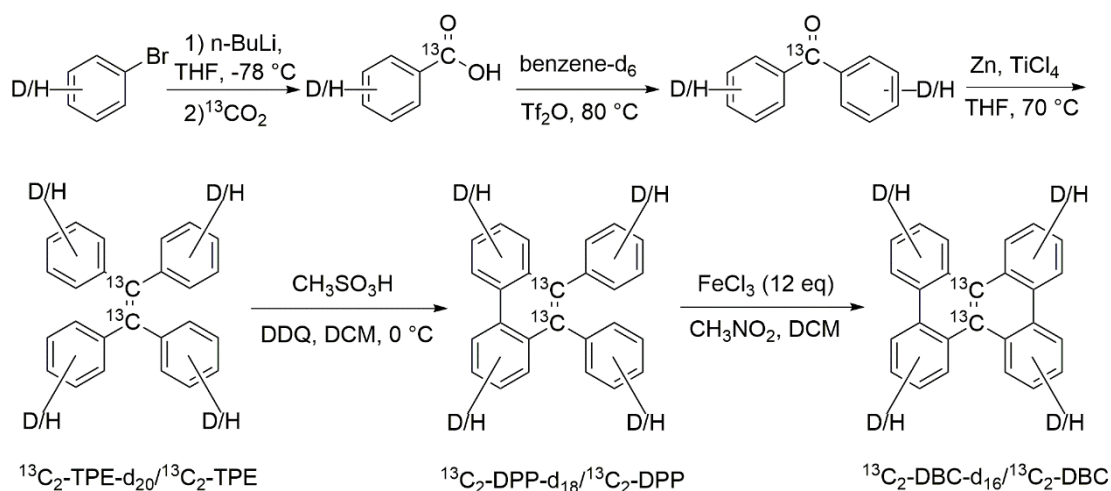

Scheme S1: Synthetic route for the molecules.

### 1.3 Synthesis of 1- $^{13}\text{C}$ -benzoic acid- $\text{d}_5$ <sup>[2]</sup>

This compound was synthesized by the reported procedure with a slightly modification. To a stirred solution of bromobenzene- $\text{d}_5$  (4.8 g, 30 mmol) in anhydrous THF (35 mL) at -78 °C in two-necked round-bottom flask, *n*-butyl lithium (25 mL, 1.6 M in hexane, 40 mmol) was slowly added under  $\text{N}_2$  atmosphere. Upon completion, the reaction mixture was stirred for 0.5 h and subsequently bubbled by  $^{13}\text{CO}_2$  for another 0.5 h at the same temperature. Then reaction mixture was allowed to warm to room temperature. After stirred overnight, the reaction mixture was quenched by saturated aqueous ammonium chloride solution, adjusted to pH = 1.0 by addition of hydrochloride aqueous solution (1.0 M) and extracted with ethyl acetate (25 mL  $\times$  3). The organic layer was combined and washed by brine (20 mL  $\times$  2), dried by anhydrous  $\text{Na}_2\text{SO}_4$ . After filtration, the filtrate was concentrated under reduced pressure to the product of 1- $^{13}\text{C}$ -benzoic acid- $\text{d}_5$ .  $^1\text{H}$  NMR (300 MHz,  $(\text{CD}_3)_2\text{CO}$ ):  $\delta$  11.03 (s, 1 H).  $^2\text{H}$  NMR (46.1 MHz,  $(\text{CD}_3)_2\text{CO}$ ):  $\delta$  7.54 (s, 2  $^2\text{H}$ ), 7.66 (s, 1  $^2\text{H}$ ), 8.10 (s, 2  $^2\text{H}$ ).  $^{13}\text{C}$   $\{^1\text{H}\}$  NMR (75 MHz,  $(\text{CD}_3)_2\text{CO}$ ):  $\delta$  168.01 (s), 133.30 (t,  $^{13}\text{C-}^2\text{H}$ ,  $^1J = 24.46$  Hz), 131.17 (d,  $^{13}\text{C-}^{13}\text{C}$ ,  $^1J = 72.35$  Hz), 130.05 (t,  $^{13}\text{C-}^2\text{H}$ ,  $^1J = 24.60$  Hz), 128.80 (td,  $^{13}\text{C-}^2\text{H}$ ,  $^{13}\text{C-}^{13}\text{C}$ ,  $^1J = 24.60$  Hz,  $^2J = 4.35$  Hz).

### Synthesis of 1-<sup>13</sup>C-benzophenone-d<sub>10</sub><sup>[3]</sup>

To a 50 mL round bottom flask, 1-<sup>13</sup>C-benzoic acid-d<sub>5</sub> (384 mg, 3.0 mmol), benzene-d<sub>6</sub> (6.0 mL) and trifluoromethanesulfonic anhydride (0.71 mL) was subsequently charged. The reaction mixture was stirred at 80 °C for 4 h. After cooling down to room temperature, the reaction solution was diluted by CHCl<sub>3</sub> (20 mL), washed by 0.2 M aqueous NaOH solution (20 mL × 3), brine (20 mL), and dried by anhydrous Na<sub>2</sub>SO<sub>4</sub>. After filtration, the solvent was evaporated under reduced pressure. The resulting residue was subjected to column chromatography (eluent: ethyl acetate : petroleum ether = 1 : 15 to 1 : 5 ) to give the compound of 1-<sup>13</sup>C-benzophenone-d<sub>10</sub> (500 g, 86%). <sup>2</sup>H NMR (46.1 MHz, (CD<sub>3</sub>)<sub>2</sub>CO): δ 7.54 (s, 2 <sup>2</sup>H), 7.66 (s, 1 <sup>2</sup>H), 8.10 (s, 2 <sup>2</sup>H). <sup>13</sup>C {<sup>1</sup>H} NMR (75 MHz, (CD<sub>3</sub>)<sub>2</sub>CO) : δ 196.39 (s), 138.27 (d, <sup>13</sup>C-<sup>2</sup>H, <sup>1</sup>J = 54.55 Hz), 132.67 (t, <sup>13</sup>C-<sup>2</sup>H, <sup>1</sup>J = 24.45 Hz), 130.12 (t, <sup>13</sup>C-<sup>2</sup>H, <sup>1</sup>J = 24.17 Hz), 128.67 (td, <sup>13</sup>C-<sup>2</sup>H, <sup>13</sup>C-<sup>13</sup>C, <sup>1</sup>J = 24.72 Hz, <sup>2</sup>J = 3.73 Hz).

### Synthesis of <sup>13</sup>C<sub>2</sub>-TPE-d<sub>20</sub><sup>[4,5]</sup>

To a two-necked flask equipped with magnetic bar, preactivated zinc powder (1.0 g)<sup>[3]</sup> and anhydrous THF (25 mL) was charged under nitrogen atmosphere. The suspension cooled in an ice-water bath at 0 °C, and TiCl<sub>4</sub> (0.9 mL) was added slowly by a syringe. Upon completion, the suspension was warmed up to room temperature and stirred for 0.5 h, then heated to 70 °C for another 2.5 h. The suspension was cooled in ice-water bath again and anhydrous pyridine (0.4 mL) was dropwise added and stirred for 10 min. The solution of 1-<sup>13</sup>C-benzophenone-d<sub>10</sub> (600 mg) in anhydrous THF (22 mL) was subsequently slowly added and the suspension was then refluxed at 70 °C. After 6 h, the reaction mixture was quenched by addition of 10% K<sub>2</sub>CO<sub>3</sub> solution, and extracted with ethyl acetate (35 mL×3). The organic layer was collected and washed with brine (20 mL), followed by drying with anhydrous Na<sub>2</sub>SO<sub>4</sub>. After filtration, the filtrate was concentrated under reduced pressure. The resulting crude material was purified by column chromatography on silica gel (Eluent: petroleum ether : ethyl acetate = 50 : 1 to 10 : 1) to give a white solid (310 mg, 56%). <sup>2</sup>H NMR (46.1 MHz, THF-d<sub>8</sub>): δ 7.07 (br, 20 <sup>2</sup>H). <sup>13</sup>C {<sup>1</sup>H} NMR (75 MHz, THF-d<sub>8</sub>) : δ 144.60 (dd, *J* = 29.67 Hz, *J* = 27.10 Hz), 141.82 (s, *J* = 71 Hz), 131.68 (t, *J* = 24.02 Hz), 127.88 (t, *J* = 24.70 Hz), 126.64 (t, *J* = 24.28 Hz). HR MS (ESI): *m/z* calcd for C<sub>24</sub><sup>13</sup>C<sub>2</sub>D<sub>20</sub>Na<sup>+</sup> [*M* + Na<sup>+</sup>] 377.2780, found 377.2771.

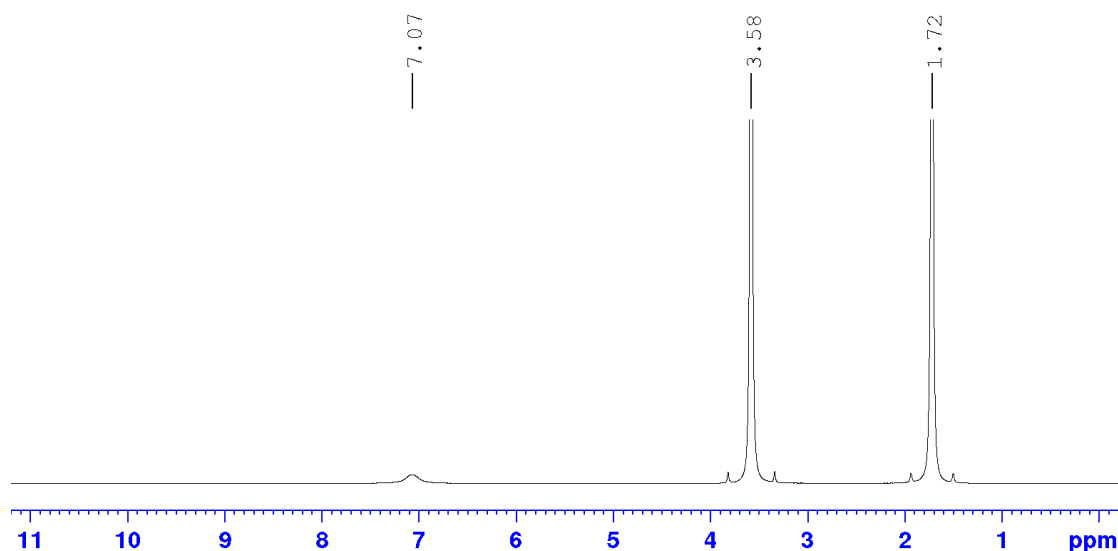

Figure S2: <sup>2</sup>H NMR of <sup>13</sup>C<sub>2</sub>-TPE-d<sub>20</sub> recorded in THF-d<sub>8</sub>.

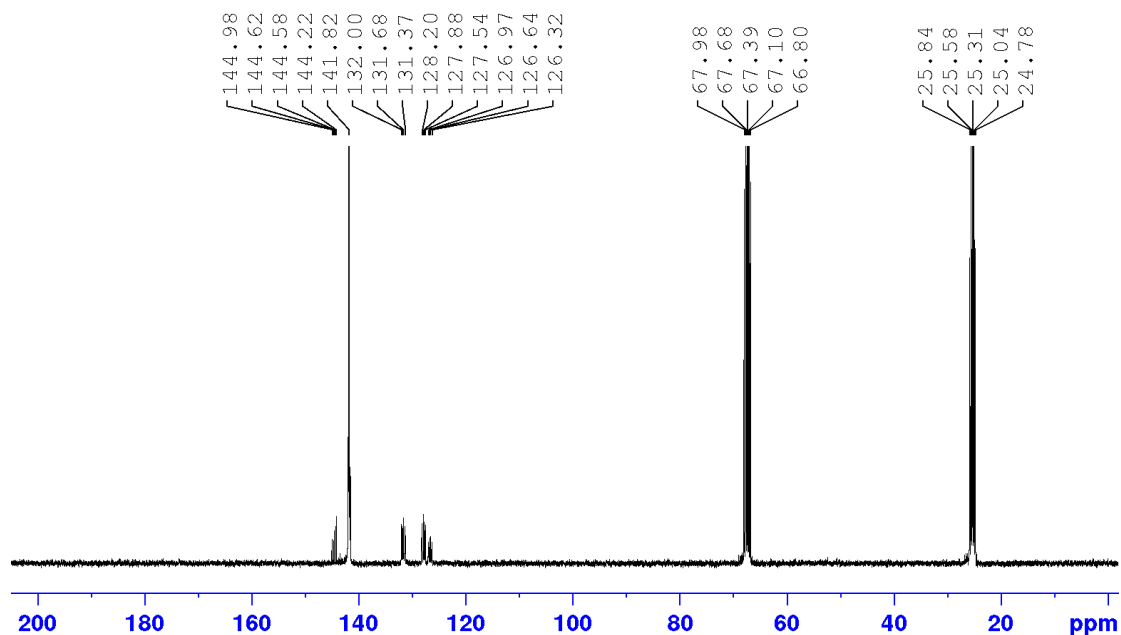

Figure S3:  $^{13}\text{C}$  NMR of  $^{13}\text{C}_2\text{-TPE-d}_{20}$  recorded in  $\text{THF-d}_8$ .

#### Synthesis of $^{13}\text{C}_2\text{-DPP-d}_{18}$ <sup>[6]</sup>

To the solution of  $^{13}\text{C}_2\text{-TPE-d}_{20}$  (142 mg, 0.4 mmol) under ice-water bath in dichloromethane (20 mL), methanesulfonic acid (3.7 mL) and 2,3-dichloro-5,6-dicyano-1,4-benzoquinone (99 mg) were added with stirring. After 0.5 h, the reaction mixture was quenched by slowly pouring into saturated aqueous  $\text{NaHCO}_3$  solution with vigorously stirring. The resulting mixture was extracted by ethyl acetate (20 mL  $\times$  3). The organic layer was combined and washed with water (20 mL  $\times$  3), brine (20 mL) and dried over anhydrous  $\text{Na}_2\text{SO}_4$ . After filtration, the filtrate was concentrated under reduced repressure to give a crude product, which was further purified by column chromatography (petroleum ether : ethyl acetate = 10 : 1 to 30 : 1) on silica gel to afford pure  $^{13}\text{C}_2\text{-DPP-d}_{18}$  (120 mg, 85%).  $^2\text{H}$  NMR (46.1 MHz,  $\text{THF-d}_8$ ):  $\delta$  8.91 (br, 2  $^2\text{H}$ ), 7.53 (br, 6  $^2\text{H}$ ), 7.21 (br, 10  $^2\text{H}$ ).  $^{13}\text{C}\{^2\text{H}\}$ -NMR (75 MHz,  $\text{THF-d}_8$ ):  $\delta$  139.56 (dd,  $^{13}\text{C}\text{-}^{13}\text{C}$ ,  $^{13}\text{C}\text{-}^{13}\text{C}$ ,  $J = 30.89$  Hz,  $J = 27.77$  Hz), 137.02 (s,  $^{13}\text{C}\text{-}^{13}\text{C}$ ,  $J = 62$  Hz), 131.76 (t,  $^{13}\text{C}\text{-}^{13}\text{C}$ ,  $J = 27.20$  Hz), 130.47 (t,  $^{13}\text{C}\text{-}^{13}\text{C}$ ,  $J = 1.43$  Hz), 130.06 (t,  $^{13}\text{C}\text{-}^{13}\text{C}$ ,  $J = 2.62$  Hz), 127.08 (t,  $^{13}\text{C}\text{-}^{13}\text{C}$ ,  $J = 3.09$  Hz), 126.87 (t,  $^{13}\text{C}\text{-}^{13}\text{H}$ ,  $J = 1.49$  Hz), 125.78 (t,  $^{13}\text{C}\text{-}^{13}\text{C}$ ,  $J = 2.08$  Hz), 125.73 (s), 125.67 (s), 122.03 (s). HR MS (ESI):  $m/z$  calcd for  $\text{C}_{24}^{13}\text{C}_2\text{D}_{18}\text{Na}^+$  [ $\text{M} + \text{Na}^+$ ] 373.2498, found 373.2497.

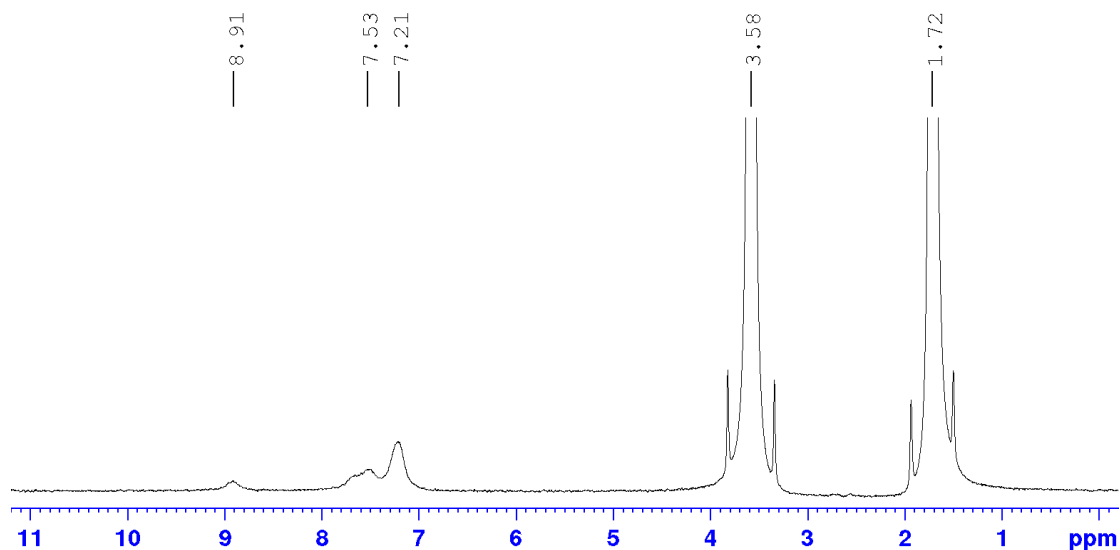

Figure S4:  $^2\text{H}$  NMR of  $^{13}\text{C}_2\text{-DPP-d}_{18}$  recorded in  $\text{THF-d}_8$ .

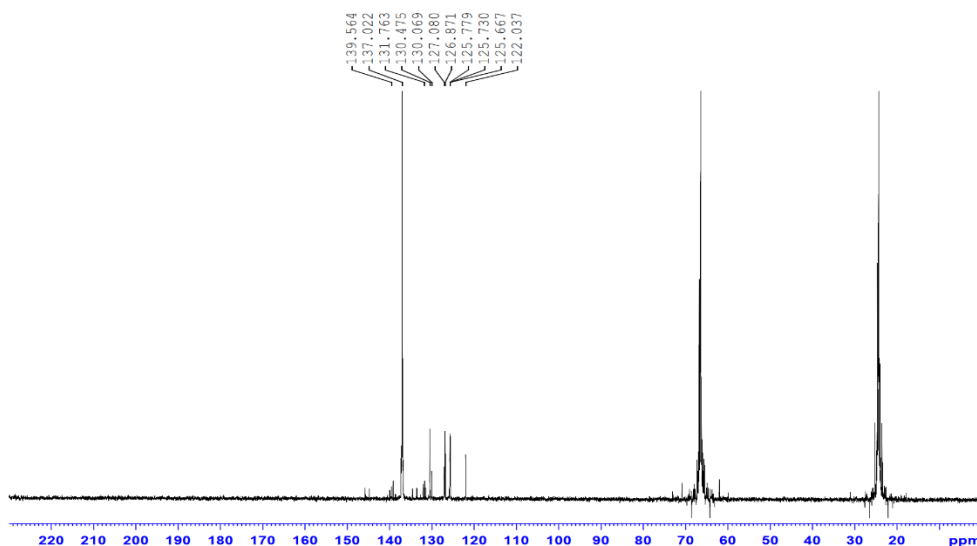

Figure S5:  $^{13}\text{C}$  NMR of  $^{13}\text{C}_2\text{-DPP-d}_{18}$  recorded in  $\text{THF-d}_8$ .

#### Synthesis of $^{13}\text{C}_2\text{-DBC-d}_{16}$ <sup>[7]</sup>

To a two-necked flask,  $^{13}\text{C}_2\text{-DPP-d}_{18}$  (120 mg, 0.34 mmol) was dissolved in dichloromethane (25 mL) and degassed by three freeze-pump-thaw cycles. To this solution, a solution of  $\text{FeCl}_3$  (676 mg) in  $\text{CH}_3\text{NO}_2$  (6.0 mL) was added under  $\text{N}_2$  atmosphere with stirring at room temperature. After 10 min, the reaction mixture was quenched by methanol and washed by water (15 mL  $\times$  3), brine (20 mL). The organic layer was collected and dried with anhydrous  $\text{Na}_2\text{SO}_4$ . After filtration, the filtrate was concentrated under reduced pressure to give a residue, which was purified by column chromatography on silica gel to afford a white solid (41 mg, 34%).  $^2\text{H}$  NMR (46.1 MHz,  $\text{THF-d}_8$ ):  $\delta$  8.79 (br, 8  $^2\text{H}$ ), 7.70 (br, 8  $^2\text{H}$ ).  $^{13}\text{C}\{^2\text{H}\}$ -NMR (75 MHz,  $\text{CDCl}_3$ ):  $\delta$  130.86 (t,  $^{13}\text{C}$ - $^{13}\text{C}$ ,  $J = 2.52$  Hz), 129.09 (dd,  $^{13}\text{C}$ - $^{13}\text{C}$ ,

$^{13}\text{C}$ - $^{13}\text{C}$ ,  $J = 32.57$  Hz,  $J = 26.30$  Hz), 128.17 (t,  $^{13}\text{C}$ - $^{13}\text{C}$ ,  $J = 2.31$  Hz), 127.21 (s,  $^{13}\text{C}$ - $^{13}\text{C}$ ,  $J = 57$  Hz), 125.96 (s), 125.85 (t,  $^{13}\text{C}$ - $^{13}\text{C}$ ,  $J = 1.82$  Hz), 123.17 (s). HR MS (ESI):  $m/z$  calcd for  $\text{C}_{24}^{13}\text{C}_2\text{D}_{16}\text{Na}^+$  [ $M + \text{Na}^+$ ] 369.2216, found 369.2207.

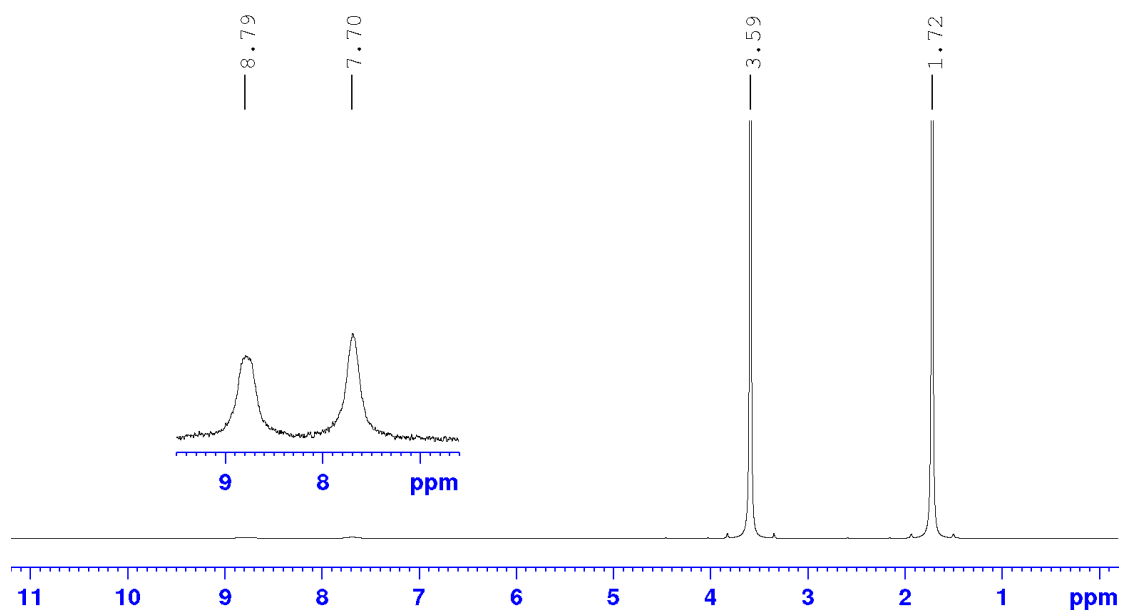

Figure S6:  $^2\text{H}$  NMR of  $^{13}\text{C}_2\text{-DBC-d}_{16}$  recorded in  $\text{THF-d}_8$ .

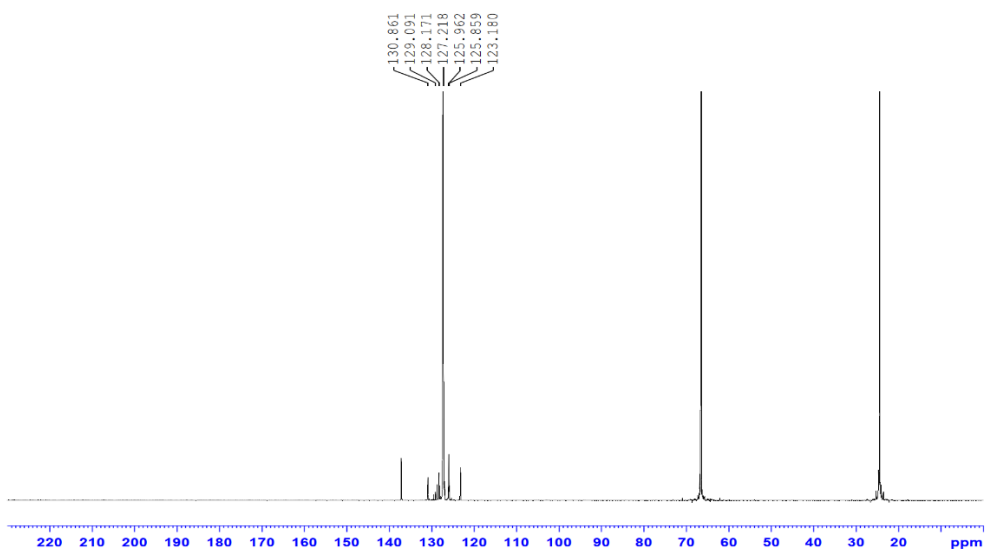

Figure S7:  $^{13}\text{C}$  NMR of  $^{13}\text{C}_2\text{-DBC-d}_{16}$  recorded in  $\text{CDCl}_3$ .

---

### Synthesis of $^{13}\text{C}_2\text{-TPE}$

This chemical agent was synthesized by using the same method described as  $^{13}\text{C}_2\text{-TPE-d}_{20}$ .  $^1\text{H}$  NMR (300 MHz,  $\text{CDCl}_3$ ):  $\delta$  7.06-7.11 (m, 20 H).  $^{13}\text{C}\{^1\text{H}\}$  NMR (75 MHz,  $\text{CDCl}_3$ ):  $\delta$  143.73 (dd,  $^{13}\text{C}\text{-}^{13}\text{C}$ ,  $^1J = 27.19$  Hz,  $^2J = 26.98$  Hz), 140.90 (singlet)<sup>[4]</sup>, 131.30 (dd,  $^{13}\text{C}\text{-}^{13}\text{C}$ ,  $^2J = 1.90$  Hz,  $^3J = 1.84$  Hz), 127.61 (dd,  $^{13}\text{C}\text{-}^{13}\text{C}$ ,  $^3J = 1.72$  Hz,  $^4J = 1.41$  Hz), 126.38 (s).

### Synthesis of $^{13}\text{C}_2\text{-DPP}$

This chemical agent was synthesized by using the same method described as  $^{13}\text{C}_2\text{-DPP-d}_{18}$ .  $^1\text{H}$  NMR (300 MHz,  $\text{THF-d}_8$ ):  $\delta$  8.87 (d, 2 H,  $J = 8.32$  Hz), 7.63 (td, 2 H,  $J = 7.50$  Hz,  $J = 1.28$  Hz), 7.53-7.42 (m, 4 H), 7.23-7.14 (m, 10 H).  $^{13}\text{C}\{^1\text{H}\}$  NMR (75 MHz,  $\text{THF-d}_8$ ):  $\delta$  140.70 (dd,  $^{13}\text{C}\text{-}^{13}\text{C}$ ,  $^1J = 30.96$  Hz,  $^2J = 27.52$  Hz), 138.07 (singlet), 132.79 (dd,  $^{13}\text{C}\text{-}^{13}\text{C}$ ,  $^1J = 27.69$  Hz,  $^2J = 26.87$  Hz), 131.88 (t,  $^{13}\text{C}\text{-}^{13}\text{C}$ ,  $^3J = 1.57$  Hz), 131.11 (t,  $^{13}\text{C}\text{-}^{13}\text{C}$ ,  $^2J = 2.68$  Hz), 128.47 (t,  $^{13}\text{C}\text{-}^{13}\text{C}$ ,  $^2J = 3.07$  Hz), 128.35 (t,  $^{13}\text{C}\text{-}^{13}\text{C}$ ,  $^3J = 1.51$  Hz), 127.28 (t,  $^{13}\text{C}\text{-}^{13}\text{C}$ ,  $^3J = 2.07$  Hz), 127.22 (s), 127.16 (s), 123.39 (s). HR MS (ESI):  $m/z$  calcd for  $\text{C}_{24}^{13}\text{C}_2\text{H}_{18}\text{Na}^+$  [ $\text{M} + \text{Na}^+$ ] 355.1368, found 355.1369.

### Synthesis of $^{13}\text{C}_2\text{-DBC}$

This chemical agent was synthesized by using the same method described as  $^{13}\text{C}_2\text{-DBC-d}_{16}$ .  $^1\text{H}$  NMR (300 MHz,  $\text{THF-d}_8$ ):  $\delta$  8.77 (d, 4 H,  $J = 7.65$  Hz), 8.69 (d, 4 H,  $J = 7.98$  Hz), 7.64 (m, 8 H).  $^{13}\text{C}\{^1\text{H}\}$  NMR (75 MHz,  $\text{CDCl}_3$ ):  $\delta$  130.83 (t,  $^{13}\text{C}\text{-}^{13}\text{C}$ ,  $^2J = 2.60$  Hz), 129.23 (s), 128.88 (t,  $^{13}\text{C}\text{-}^{13}\text{C}$ ,  $^2J = 2.24$  Hz), 127.45 (singlet), 126.54 (s,  $2 \times \text{C}$ ), 123.58 (s). HR MS (ESI):  $m/z$  calcd for  $\text{C}_{24}^{13}\text{C}_2\text{H}_{16}\text{Na}^+$  [ $\text{M} + \text{H}^+$ ] 331.1392, found 331.1401.

## Singlet State Experiments

The NMR experiments were performed on a 7.05 T or 16.5 T NMR spectrometer (Bruker Biospin, DE) at 298 K. Data were acquired and analyzed via the proprietary spectrometer software TopSpin 3.5pl7 and TopSpin 4.0.3 (Bruker Biospin, DE), respectively.

The spin-lattice relaxation time  $T_1$  for all molecule were measured by using inversion recovery method. The pulse program t1irig in the standard Bruker pulse sequence library was employed to measure the  $T_1$  value of  $^{13}\text{C}$  and  $^{15}\text{N}$  in the molecules.

The spin density operator was converted from magnetization into singlet and back to magnetization for observation using the SLIC sequence<sup>[8]</sup>, by exploiting the asymmetry in the  $J$ -couplings with the closest  $^2\text{H}$  nuclei. During the sequence, radio-frequency pulses were applied on-resonance at the frequency of the spin pair bearing the singlet. CW decoupling was applied during the sustaining period  $d_{25}$ . The principal condition for spin order transfer is that the power level of the conversion blocks and matches the intra-nuclear  $J$ -coupling. The power level during the conversion blocks corresponded to a nutation frequency of 71 Hz, 62 Hz and 57 Hz for the  $^{13}\text{C}_2\text{-TPE-d}_{20}$ ,  $^{13}\text{C}_2\text{-DPP-d}_{18}$  and  $^{13}\text{C}_2\text{-DBC-d}_{16}$  sample, respectively. The blocks had a duration of  $p11 = 1370,000$  ms for  $^{13}\text{C}_2\text{-TPE-d}_{20}$ , 1150,000 ms for  $^{13}\text{C}_2\text{-DPP-d}_{18}$  and 1500,000 ms for  $^{13}\text{C}_2\text{-DBC-d}_{16}$ . The singlet relaxation time  $T_s$  was measured by

monitoring the NMR signal decay during the variable delay  $d_{25}$ . The  $T_1$  value of the  $^{15}\text{N}$  in the  $^{15}\text{N}, ^{15}\text{N}$ -Azobenzene- $d_{10}$  has been determined in the same way at 16 Hz nutation frequency with a duration of  $p_{11} = 1200$  ms.

#### Singlet and thermal NMR spectra in THF- $d_8$ at different $\text{D}_2\text{O}$ concentrations

Thermal and singlet NMR spectra of  $^{13}\text{C}_2$ -TPE- $d_{20}$ ,  $^{13}\text{C}_2$ -DPP and  $^{13}\text{C}_2$ -DBC- $d_{16}$  (100 mM) in THF have been measured at different  $\text{D}_2\text{O}$  concentrations. No linear correlation of singlet state population efficiency and  $\text{D}_2\text{O}$  content of the sample could be detected. However at concentrations of 50 %  $\text{D}_2\text{O}$  for  $^{13}\text{C}_2$ -TPE- $d_{20}$ , 20 %  $\text{D}_2\text{O}$  for  $^{13}\text{C}_2$ -DPP and 35 % for  $^{13}\text{C}_2$ -DBC- $d_{16}$  respectively, population of the singlet state was not possible anymore and no singlet state spectrum could be obtained while thermal NMR spectra could still be obtained.

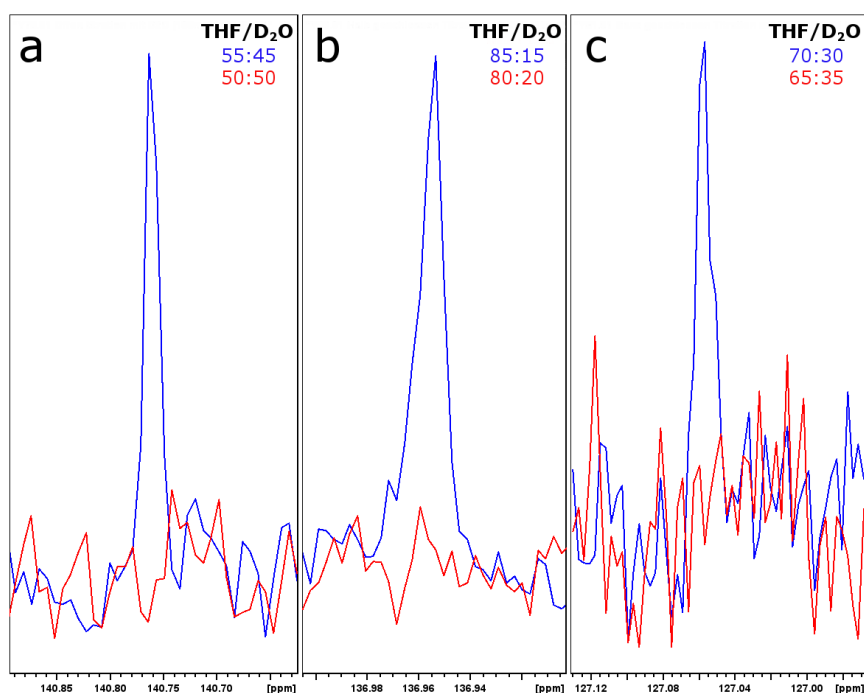

Figure S8:  $^{13}\text{C}$  singlet NMR spectra of  $^{13}\text{C}_2$ -TPE- $d_{20}$  (a),  $^{13}\text{C}_2$ -DPP (b) and  $^{13}\text{C}_2$ -DBC- $d_{16}$  (c) at different THF/ $\text{D}_2\text{O}$  ratios. While the singlet state can be populated and a singlet NMR spectrum can be obtained up to a certain solvent ratio, after this threshold, no singlet NMR spectrum can be obtained.

#### **Structure calculations**

Geometry optimizations and NMR shielding computations were performed with Gaussian09.<sup>[9]</sup> Structures were optimized at B3LYP/6-31+G(d,p) level using a polarizable continuum model (IEFPCM)<sup>[10]</sup> for THF ( $\epsilon = 7.4257$ ). Harmonic vibrational frequencies were computed to confirm convergence into stationary states. Chemical shieldings were computed using the GIAO method<sup>[11]</sup> as implemented in Gaussian09. To convert chemical shieldings into chemical shifts referenced to TMS, a model for TMS was optimized at the same level of theory (point group:  $T$ ), and the chemical shielding for the  $\text{CH}_3$  groups in TMS were used as chemical shift reference.



Table S1: A summary of DFT calculation.

| compounds                          | $^{13}\text{C}_2\text{-TPE-d}_{20}$ | $^{13}\text{C}_2\text{-DPP-d}_{18}$ | $^{13}\text{C}_2\text{-DBC-d}_{16}$ |
|------------------------------------|-------------------------------------|-------------------------------------|-------------------------------------|
| point group                        | D <sub>2</sub>                      | C <sub>2</sub>                      | D <sub>2</sub>                      |
| $\delta$ ( $^{13}\text{C}$ ) [ppm] | 112.0                               | 106.6                               | 95.5                                |
| CSA ( $^{13}\text{C}$ ) [ppm]      | 126.0                               | 148.4                               | 162.9                               |
| d ( $^{13}\text{C}$ , H) [Å]       | 2x 2.724, 2x 2.7330,<br>2x 2.954    | 4x (2.724 to 2.741),<br>2x 2.95     | 2 x 2.738                           |
| d (H, H) [Å]                       | 3.54                                | 3.098                               | 2.123                               |

### Fluorescence spectroscopy:

Fluorescence measurements were carried out at an excitation wavelength of 320 nm at concentrations of 10  $\mu\text{M}$  of  $^{13}\text{C}_2\text{-TPE-d}_{20}$ ,  $^{13}\text{C}_2\text{-DPP}$  and  $^{13}\text{C}_2\text{-DBC-d}_{16}$  respectively. Samples have been measured at different ratios of THF to H<sub>2</sub>O (THF/H<sub>2</sub>O 100:0 to THF/H<sub>2</sub>O 5:95 in steps of 5). Those measurements showed no linear correlation of the solvent ratio to the fluorescence effects but rather a rapid change at THF/H<sub>2</sub>O (30:70) for  $^{13}\text{C}_2\text{-TPE-d}_{20}$ , THF/H<sub>2</sub>O (20:80) for  $^{13}\text{C}_2\text{-DPP}$  and THF/H<sub>2</sub>O (20:80) for  $^{13}\text{C}_2\text{-DBC-d}_{16}$ . At higher water concentrations minor changes could still be detected but up to the respective water concentrations hardly any change could be observed.

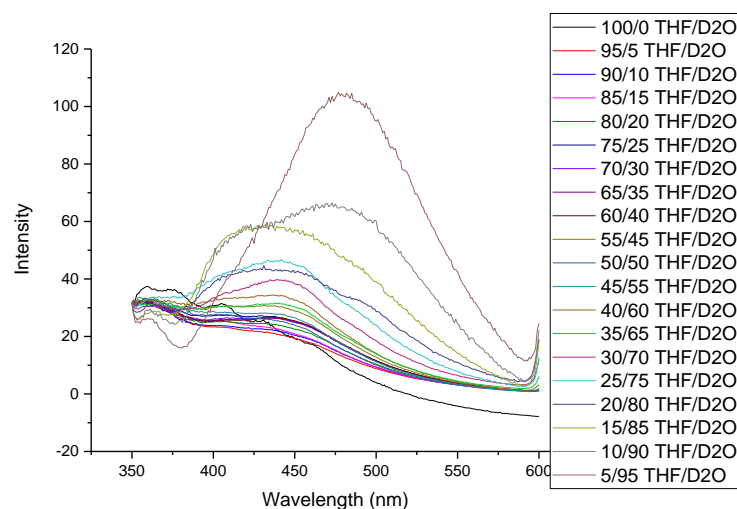

Figure S9: Fluorescence spectra of 10  $\mu\text{M}$  of  $^{13}\text{C}_2\text{-TPE-d}_{20}$  in THF at H<sub>2</sub>O concentrations of 0 % to 95 %.

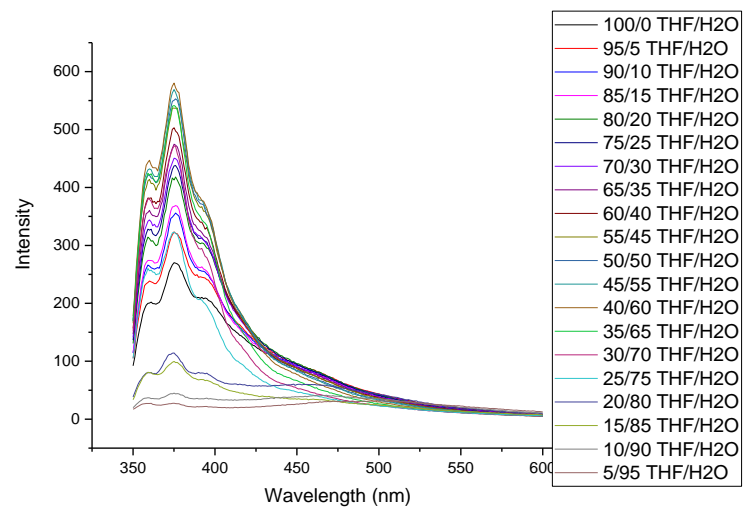

Figure S10: Fluorescence spectra of  $^{13}\text{C}_2\text{-DPP}$  in THF at H<sub>2</sub>O concentrations of 0 % to 95 %.

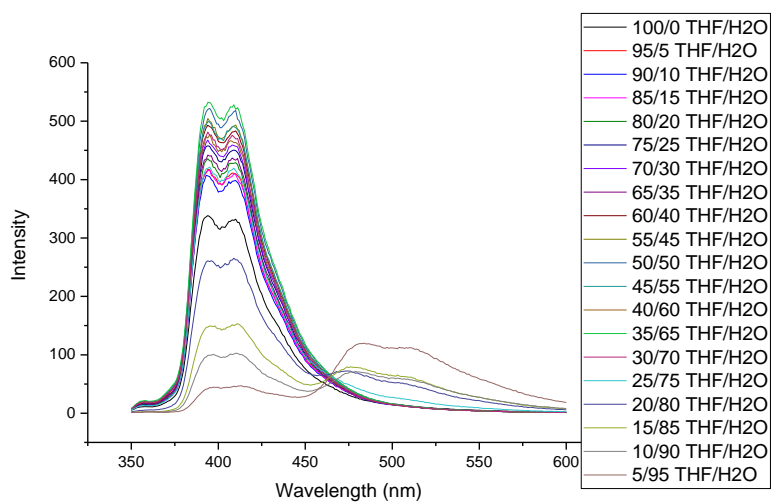

Figure S11: Fluorescence spectra of  $^{13}\text{C}_2\text{-DBC-d}_{16}$  in THF at H<sub>2</sub>O concentrations of 0 % to 95 %.

---

**UV/VIS measurements:**

UV/VIS absorbance spectra have been recorded at an Eppendorf BioSpectrometer. Spectra have been measured in THF for  $^{13}\text{C}_2$ -DPP, and  $^{13}\text{C}_2$ -DBC- $\text{d}_{16}$  and in THF/ $\text{H}_2\text{O}$  (5:95) for  $^{13}\text{C}_2$ -TPE- $\text{d}_{20}$ . The extinction coefficients in the same solvents have been determined by determination of the absorption at concentrations of 10  $\mu\text{M}$ , 20  $\mu\text{M}$  and 30  $\mu\text{M}$ .

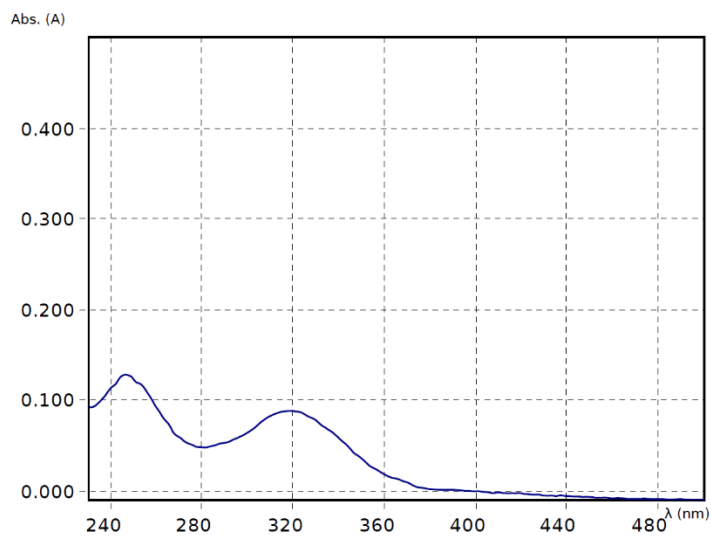

Figure S12: UV/VIS spectrum of  $^{13}\text{C}_2$ -TPE- $\text{d}_{20}$  in THF/ $\text{H}_2\text{O}$  (5:95).

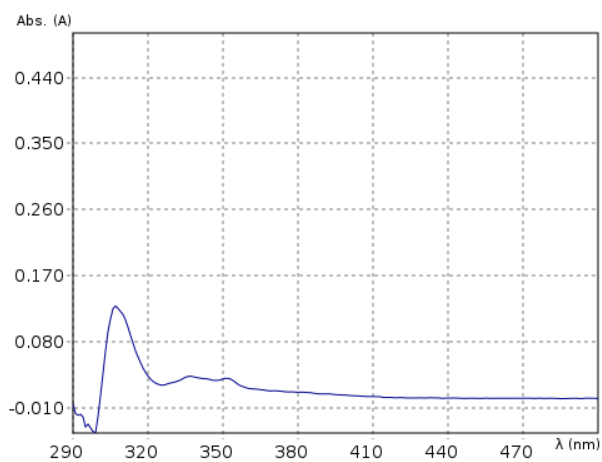

Figure S13: UV/VIS spectrum of  $^{13}\text{C}_2$ -DPP in THF.

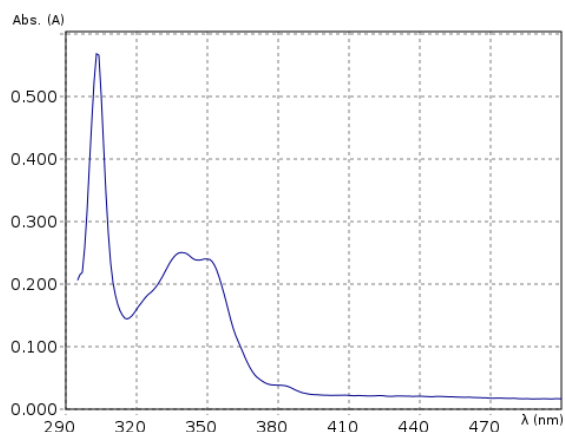

Figure S14: UV/VIS spectrum of  $^{13}\text{C}_2\text{-DBC-d}_{16}$  in THF.

- [1] K.F. Sherberstov, H.-M. Vieth, H. Zimmermann, K.L. Ivanov, A.S. Kiryutin, A.V. Yurkovskaya, *Appl. Magn. Res.* **49**, 293-307.
- [2] L. Ackermann, A. V. Lygin, N. Hofmann, *Angew. Chem. Int. Ed.* **2011**, *50*, 6379-6382.
- [3] R. H. Dodd, G. Poissonnet, P. Potier, *Heterocycles* **1989**, *129*, 365-380.
- [4] X.-F. Duan, J. Zeng, J.-W. Lü, Z.-B. Zhang, *J. Org. Chem.* **2006**, *71*, 9873-9876.
- [5] S. Yang, J. McCormick, S. Mamone, L.-S. Bouchard, S. Glöggler, *Angew. Chem. Int. Ed.* **2019**, *58*, 2879-2883.
- [6] T. S. Navale, K. Thakur, R. Rathore, *Org. Lett.* **2011**, *13*, 1634-1637.
- [7] J. Ma, T. Lin, X. Pan, W. Wang, *Chem. Mater.* **2014**, *26*, 4221-4229.
- [8] S. J. DeVience, R. L. Walsworth, M. S. Rosen, *Phys. Rev. Lett.* **2013**, *111*, 173002.
- [9] Gaussian 09, Revision C.01, M. J. Frisch, G. W. Trucks, H. B. Schlegel, G. E. Scuseria, M. A. Robb, J. R. Cheeseman, G. Scalmani, V. Barone, B. Mennucci, G. A. Petersson, H. Nakatsuji, M. Caricato, X. Li, H. P. Hratchian, A. F. Izmaylov, J. Bloino, G. Zheng, J. L. Sonnenberg, M. Hada, M. Ehara, K. Toyota, R. Fukuda, J. Hasegawa, M. Ishida, T. Nakajima, Y. Honda, O. Kitao, H. Nakai, T. Vreven, J. A. Montgomery, Jr., J. E. Peralta, F. Ogliaro, M. Bearpark, J. J. Heyd, E. Brothers, K. N. Kudin, V. N. Staroverov, T. Keith, R. Kobayashi, J. Normand, K. Raghavachari, A. Rendell, J. C. Burant, S. S. Iyengar, J. Tomasi, M. Cossi, N. Rega, J. M. Millam, M. Klene, J. E. Knox, J. B. Cross, V. Bakken, C. Adamo, J. Jaramillo, R. Gomperts, R. E. Stratmann, O. Yazyev, A. J. Austin, R. Cammi, C. Pomelli, J. W. Ochterski, R. L. Martin, K. Morokuma, V. G. Zakrzewski, G. A. Voth, P. Salvador, J. J. Dannenberg, S. Dapprich, A. D. Daniels, O. Farkas, J. B. Foresman, J. V. Ortiz, J. Cioslowski, D. J. Fox, Gaussian, Inc., Wallingford CT, **2010**.
- [10] S. Miertuš, E. Scrocco, J. Tomasi, *Chem. Phys.* **1981**, *55*, 117-129.
- [11] R. Ditchfield, *Mol. Phys.* **1974**, *27*, 789-807.
